# Supplementary material for: Kainate receptor channel opening and gating mechanism
Source: PubMed Central journal article supplement (PMC11186766; doi:10.1038/s41586-024-07475-0), 2024-05-22
Supplement: 41586_2024_7475_MOESM1_ESM.pdf [file 41586_2024_7475_MOESM1_ESM.pdf]

**Supplementary information**

---

**Kainate receptor channel opening and gating mechanism**

---

In the format provided by the authors and unedited

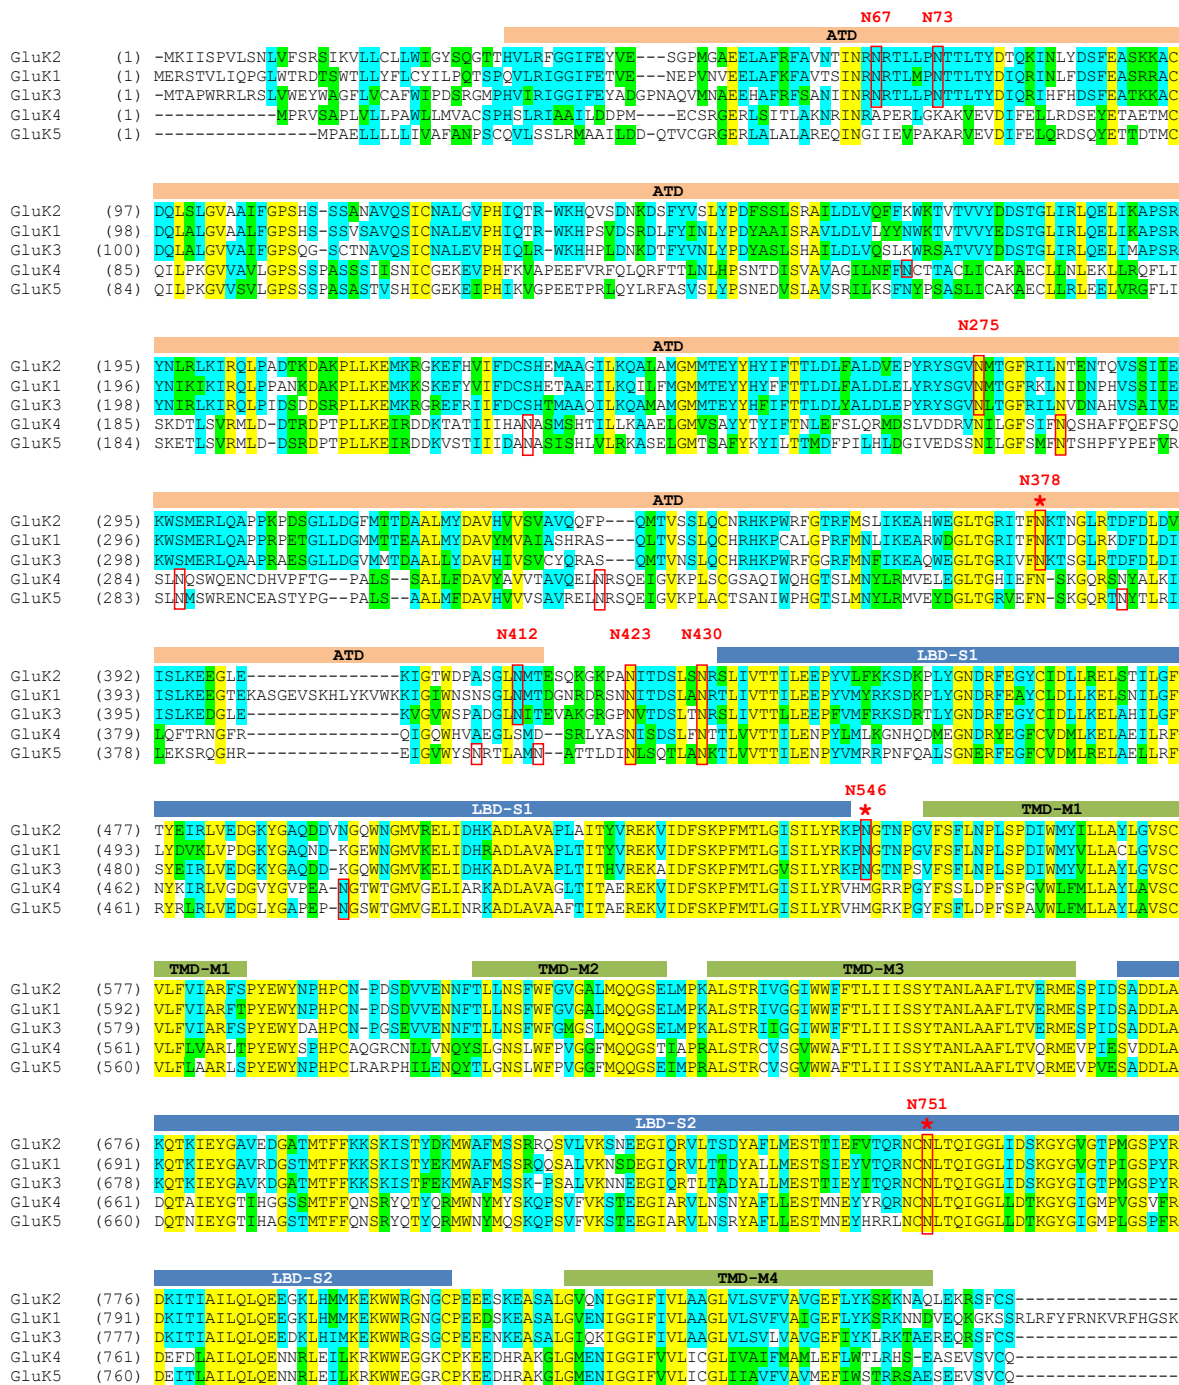

**Supplementary Figure 1. Sequence alignment of KAR subunits.** Boundaries of ATD, LBD and TMD for GluK2 are depicted by different color rectangles above the sequences. Glycosylation sites are indicated by red boxes and labeled. Glycosylation sites involved in ConA binding are also labeled by red stars.
